# Supplementary material for: Identification of FadT as a Novel Quorum Quenching Enzyme for the Degradation of Diffusible Signal Factor in Cupriavidus pinatubonensis Strain HN-2
Source: MDPI journal article supplement (doi:10.3390/ijms22189862), 2021-09-13
Supplement: s1 [file s1]

## Supplemental Materials

# Identification of FadT as a Novel Quorum Quenching Enzyme for the Degradation of Diffusible Signal Factor in *Cupriavidus pinatubonensis* Strain HN-2

Xudan Xu <sup>1,2,†</sup>, Tian Ye <sup>1,2,†</sup>, Wenping Zhang <sup>1,2</sup>, Tian Zhou <sup>1,2</sup>, Xiaofan Zhou <sup>1,2,\*</sup>, Weijun Dai <sup>1,2,\*</sup> and Shaohua Chen <sup>1,2,\*</sup>

<sup>1</sup> Integrative Microbiology Research Centre, State Key Laboratory for Conservation and Utilization of Subtropical Agro-Bioresources, Guangdong Province Key Laboratory of Microbial Signals and Disease Control, South China Agricultural University, Guangzhou 510642, China; xuxudan@stu.scau.edu.cn (X.X.); 20182047012@stu.scau.edu.cn (T.Y.); 20191047008@stu.scau.edu.cn (W.Z.); 20171021009@stu.scau.edu.cn (T.Z.)

<sup>2</sup> Guangdong Laboratory for Lingnan Modern Agriculture, Guangzhou 510642, China

\* Correspondence: xiaofan\_zhou@scau.edu.cn (X.Z.); daiweijun@scau.edu.cn (W.D.); shchen@scau.edu.cn (S.C.); Tel.: +86-20-8528-8229 (S.C.)

† Both authors contributed equally to this work.

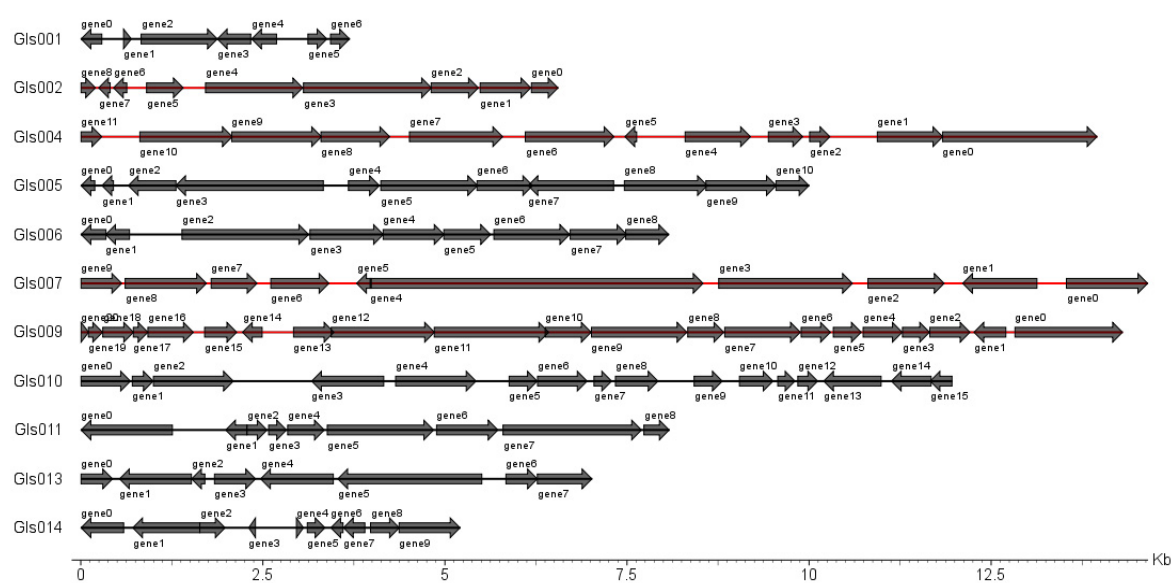

**Figure S1.** Statistical diagram of gene distribution in the *Cupriavidus pinatubonensis* HN-2 gene island.

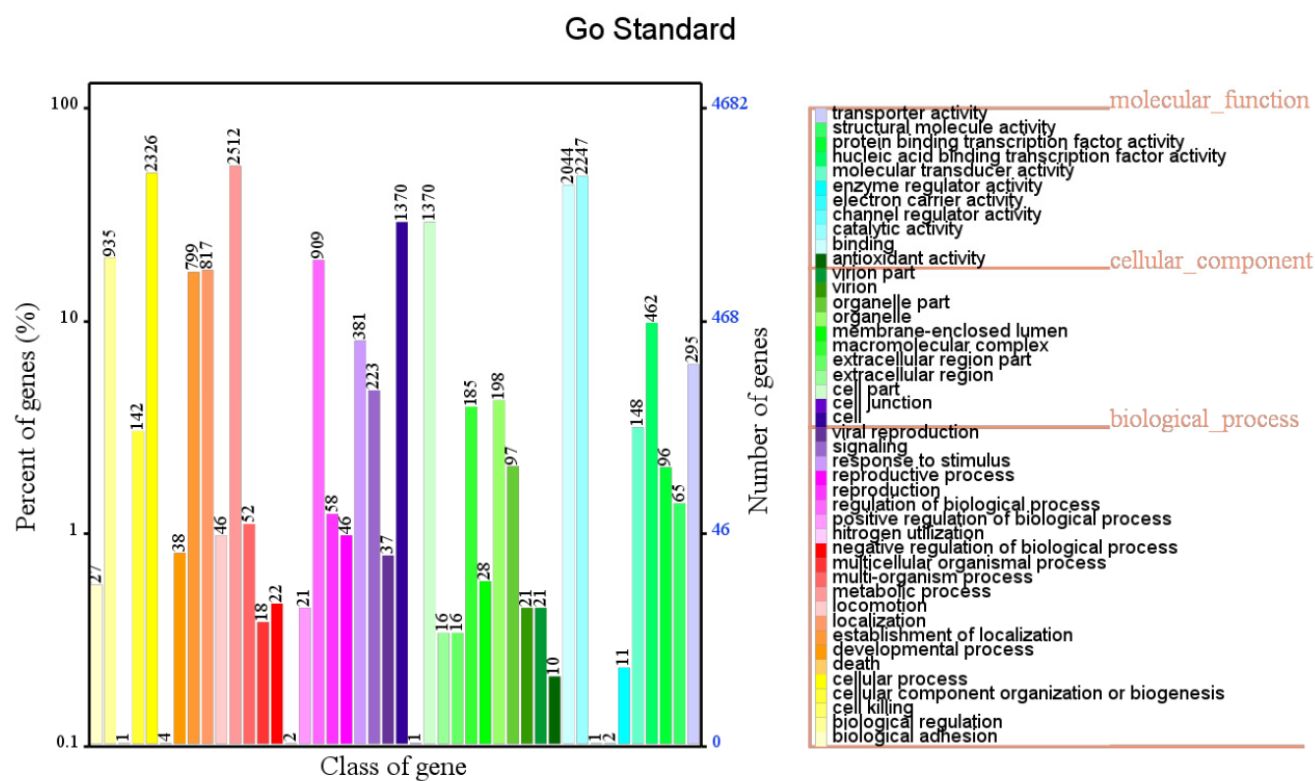

**Figure S2.** Classification of *Cupriavidus pinatubonensis* HN-2 functional genes in the GO database.

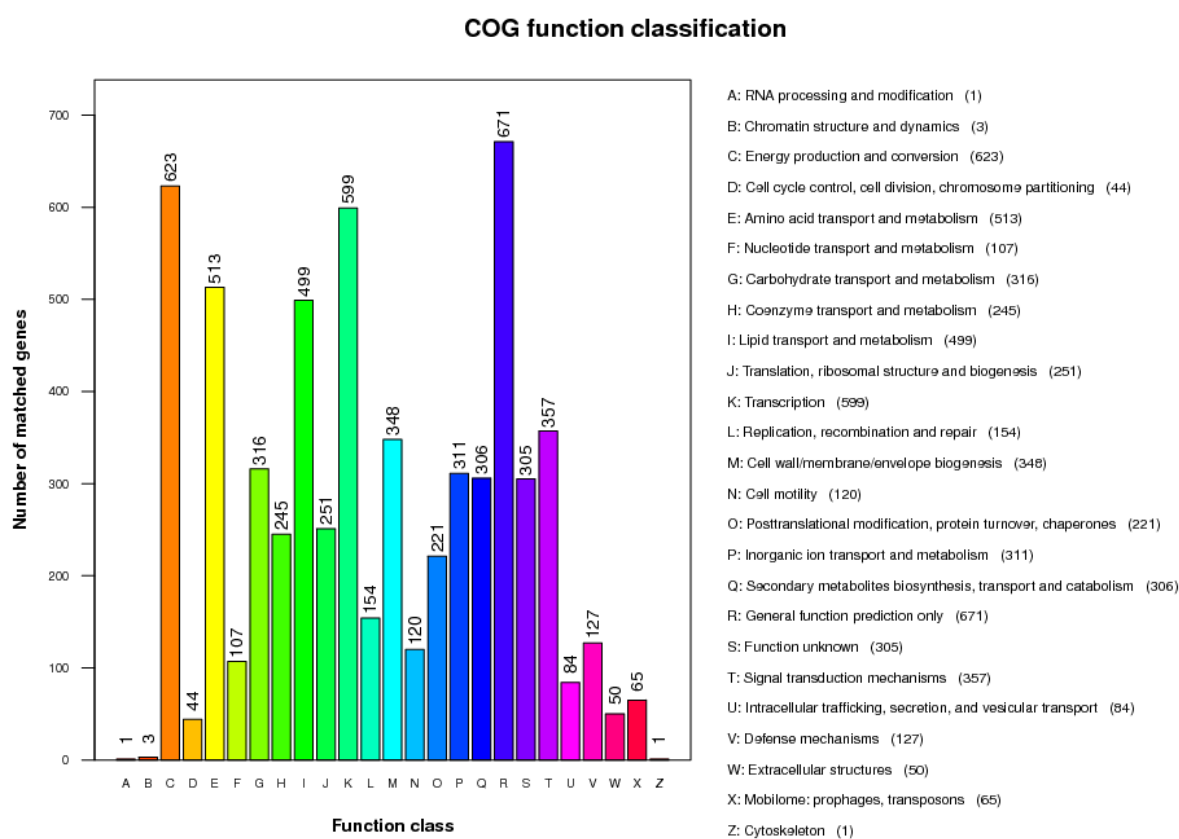

**Figure S3.** Classification of *Cupriavidus pinatubonensis* HN-2 functional genes in the COG database.

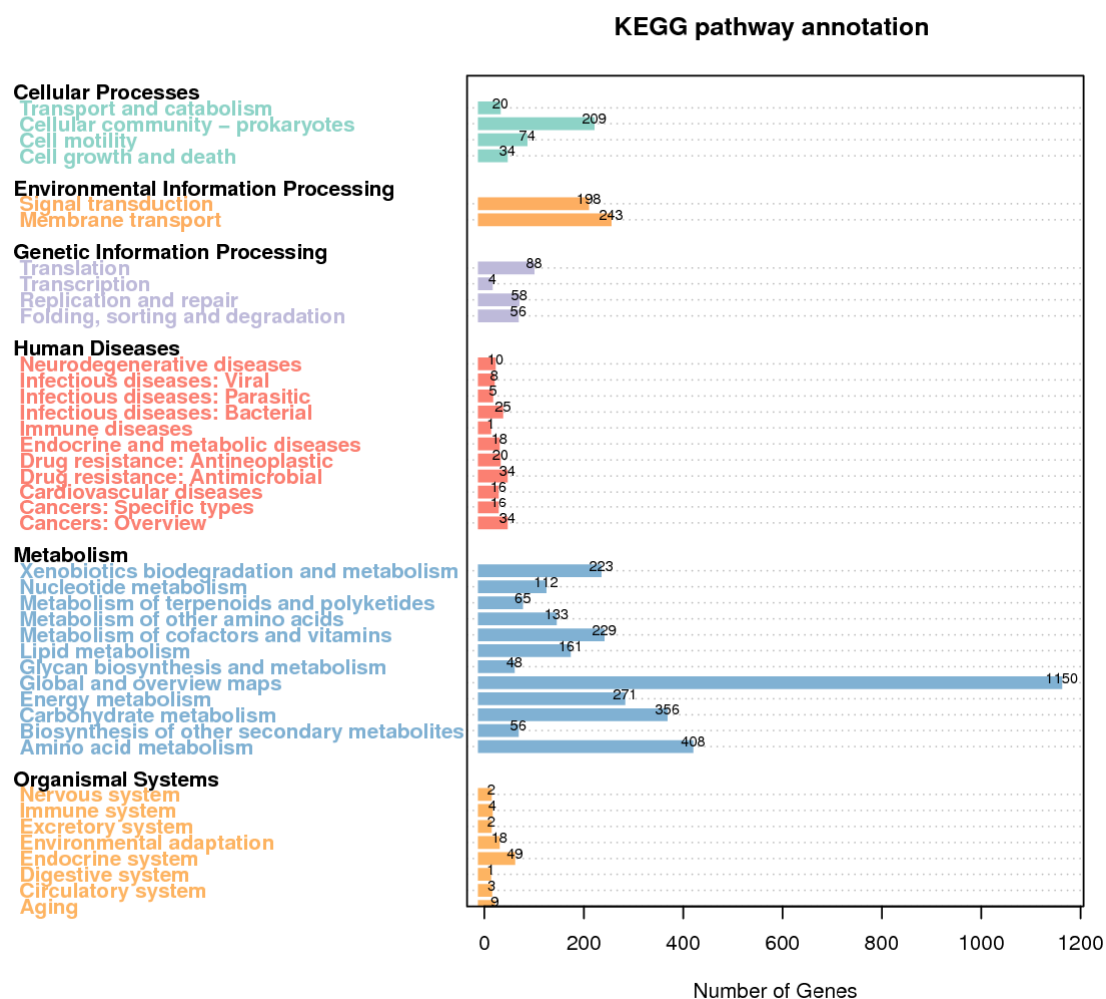

**Figure S4.** KEGG metabolic pathway classification diagram of *Cupriavidus pinatubonensis* HN-2.

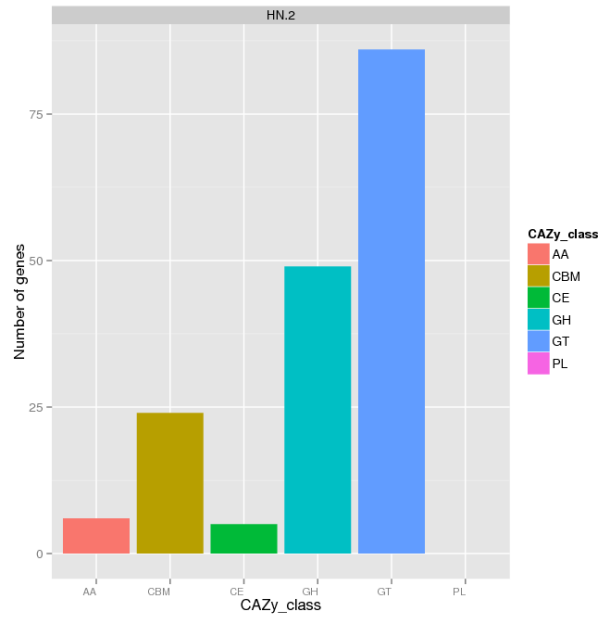

**Figure S5.** CAZy functional classification and corresponding gene number statistics of HN-2. AA: oxidoreductase; CBM: carbohydrate-binding module; CE: carbohydrate esterases; GH: glycoside hydrolase; GT: glycosyltransferase; PL: polysaccharide lyase; it was not found in the KEGG metabolic pathway of *Cupriavidus pinatubonensis* HN-2.

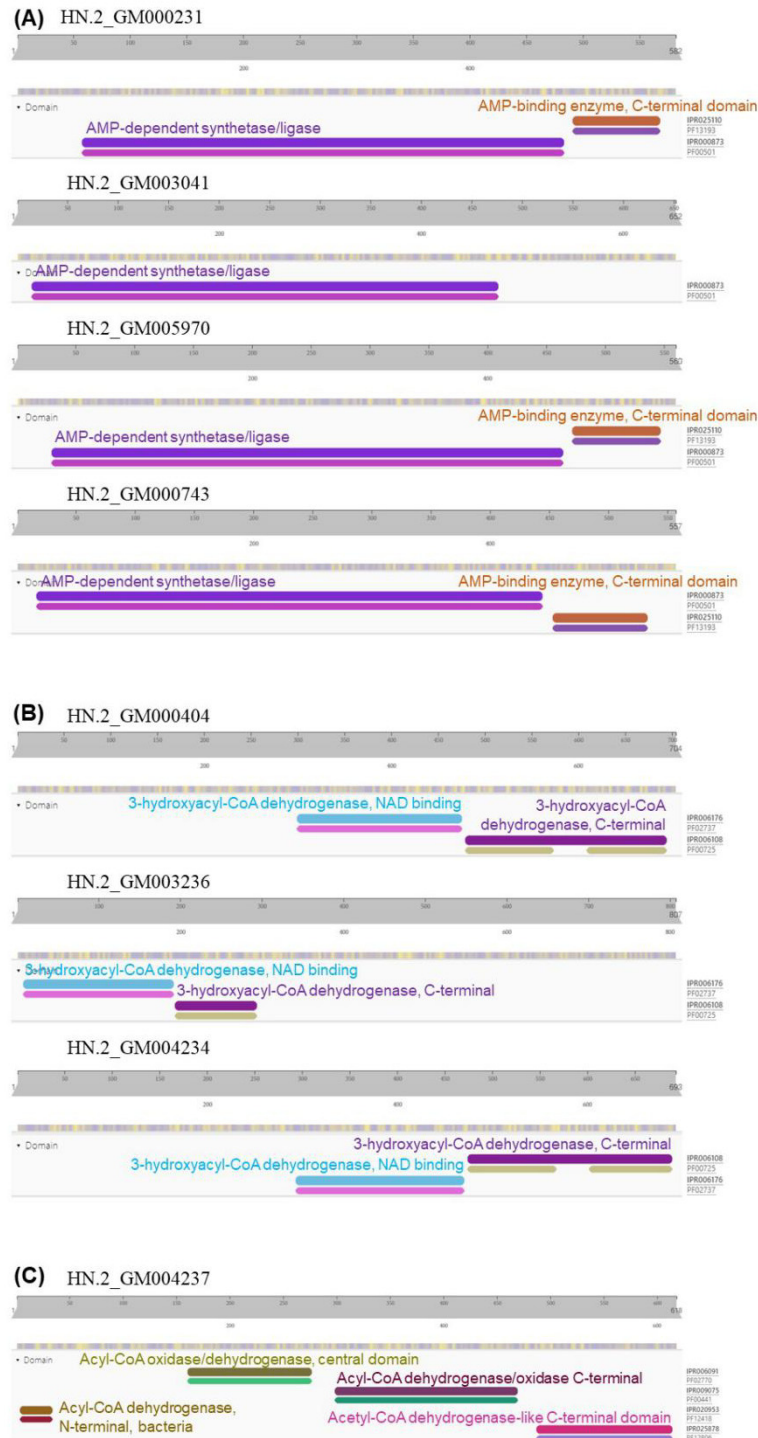

**Figure S6.** InterProScan predicted domain structures of proteins encoded by the eight genes selected for deletion assay. (A) Four long-chain acyl-CoA synthetases encoded by HN.2\_GM000231, HN.2\_GM003041, HN.2\_GM005970, and HN.2\_GM000743. Two characteristic domains were predicted, including IPR000873 “AMP-dependent synthetase/ligase” and IPR025110 “AMP-binding enzyme, C-terminal domain”. (B)

Three 3-hydroxyacyl-CoA dehydrogenases encoded by HN.2\_GM000404, HN.2\_GM003236, and HN.2\_GM004234. Two characteristic domains were predicted, including IPR006176 “3-hydroxyacyl-CoA dehydrogenase, NAD binding” and IPR006108 “3-hydroxyacyl-CoA dehydrogenase, C-terminal”. (C) The acyl-CoA dehydrogenase encoded by HN.2\_GM004237, which was named fadT in our study. Four characteristic domains were predicted, including IPR020953 “Acyl-CoA dehydrogenase, N-terminal, bacteria”, IPR006091 “Acyl-CoA oxidase/dehydrogenase, central domain”, IPR009075 “Acyl-CoA dehydrogenase/oxidase C-terminal”, and IPR025878 “Acetyl-CoA dehydrogenase-like C-terminal domain”.



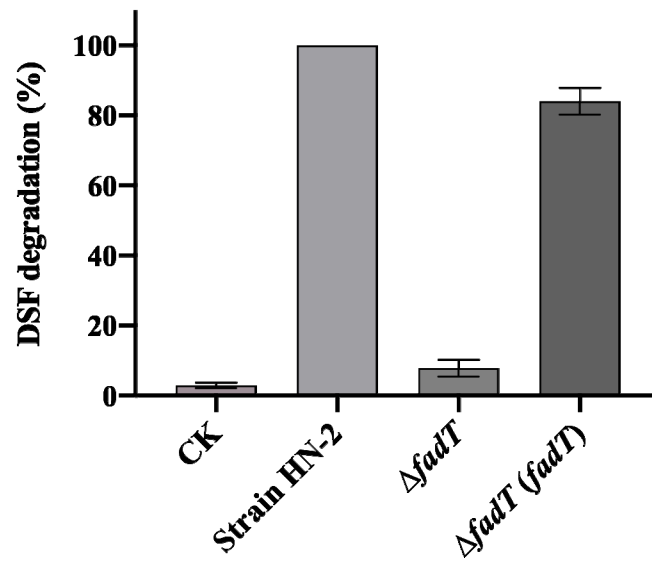

**Figure S7.** Diffusible signal factor (DSF)-degrading activity comparison of mutants and wild-type strain HN-2. CK: control; strain HN-2: wild-type;  $\Delta fadT$ : *fadT* deletion mutant;  $\Delta fadT (fadT)$ : the complement of the *fadT* deletion mutant.

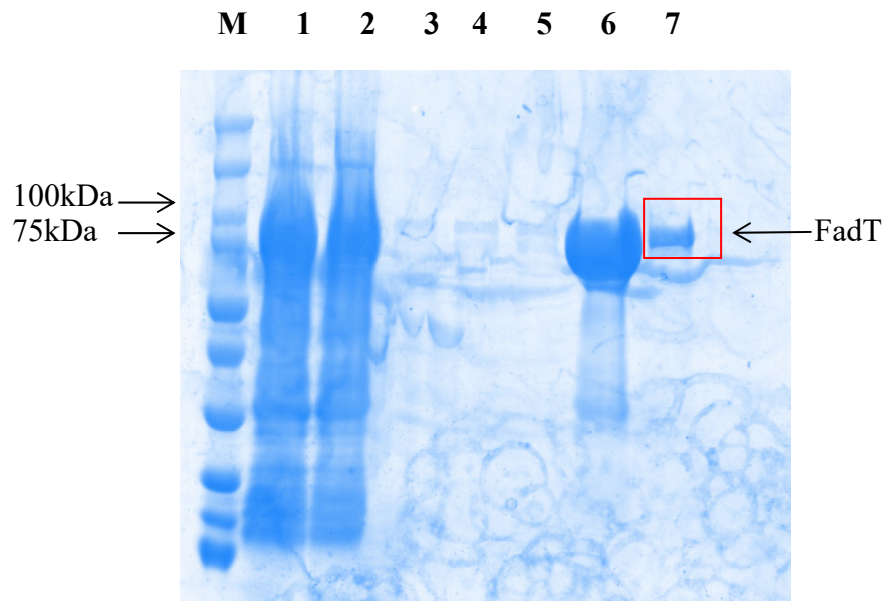

**Figure S8.** SDS-PAGE analysis of purified FadT. M: Marker; 7: Purified FadT.

A

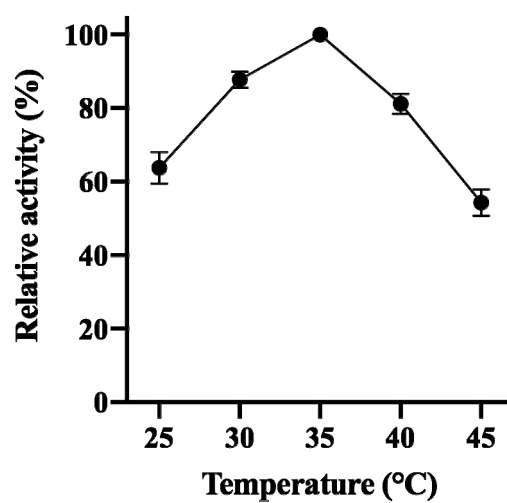

B

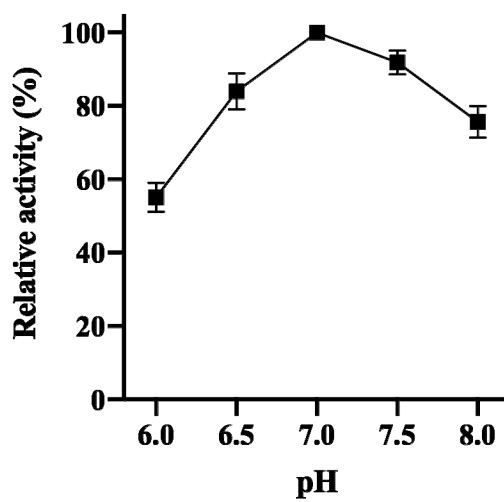

**Figure S9.** Effects of temperature and pH on FadT activity. (A) Determination of optimal temperature; (B) Determination of optimal pH.

**Table S1.** Genome characteristics of *Cupriavidus pinatubonensis* HN-2.

| Genome Characteristics                      |           |
|---------------------------------------------|-----------|
| Total length (bp)                           | 7,548,664 |
| Number of protein-coding genes              | 7,101     |
| Average length of protein-coding genes (bp) | 923       |
| % of Genome (protein-coding genes)          | 86.86%    |
| rRNA genes                                  | 18        |
| tRNA genes                                  | 65        |
| sRNAs genes                                 | 1         |

**Table S2.** Prediction of non-coding RNA (ncRNA) in strain HN-2 genome.

| Type     | Quantity | Average length(bp) | Total length(bp) | Proportion of the whole genome(%) |
|----------|----------|--------------------|------------------|-----------------------------------|
| tRNA     | 65       | 78                 | 5,087            | 0.0674                            |
| 5s rRNA  | 6        | 112                | 673              |                                   |
| 16s      | 6        | 1,522              | 9,130            | 0.3587                            |
| rRNA_23s | 6        | 2,879              | 17,274           |                                   |
| sRNA     | 1        | 88                 | 88               | 0.0012                            |
